# Supplementary material for: Thermal stability and quantum efficiency improvement of Cr3+-activated garnet phosphors via regulating A/B sites for near-infrared LED applications
Source: Royal Society of Chemistry journal article supplement (doi:10.1039/d3dt04238c), 2024-01-01
Supplement: d3dt04238c1.pdf [file d3dt04238c1.pdf]

## Electronic Supplementary Information

Thermal stability and quantum efficiency improvement  
of Cr<sup>3+</sup>-activated garnet phosphors via regulating A/B  
sites for near-infrared LED applications

*Boxin Ma*<sup>a</sup>, *Siyuan Xie*<sup>a</sup>, *Ting Yu*<sup>a</sup>, *Qingguang Zeng*<sup>a</sup>, *Xiaoguang Liu*<sup>b</sup>,  
*Yue Guo*<sup>a,b\*</sup>, *Ling Li*<sup>b,\*</sup>, *Dawei Wen*<sup>a,\*</sup>

<sup>a</sup> *School of Applied Physics and Materials, Wuyi University, Jiangmen, Guang dong, 529020, P. R. China*

<sup>b</sup> *Ministry of Education Key Laboratory for the Synthesis and Application of Organic Functional Molecules, College of Chemistry and Chemical Engineering, Hubei University, Wuhan, P.R. China*

Email: [guoyuewyu@163.com](mailto:guoyuewyu@163.com), [liling402431@hotmail.com](mailto:liling402431@hotmail.com), [ontaii@163.com](mailto:ontaii@163.com)

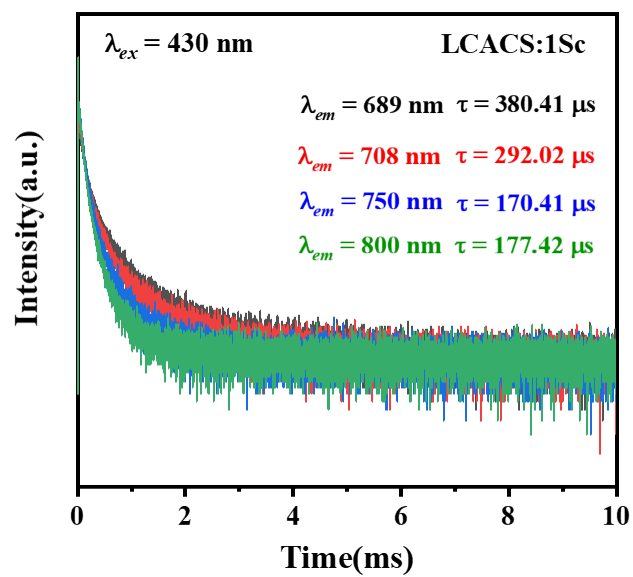

**Fig. S1** Lifetimes of LCACS: 1Sc phosphor at 689 nm, 708 nm, 750 nm and 800 nm under 430 nm excitation.

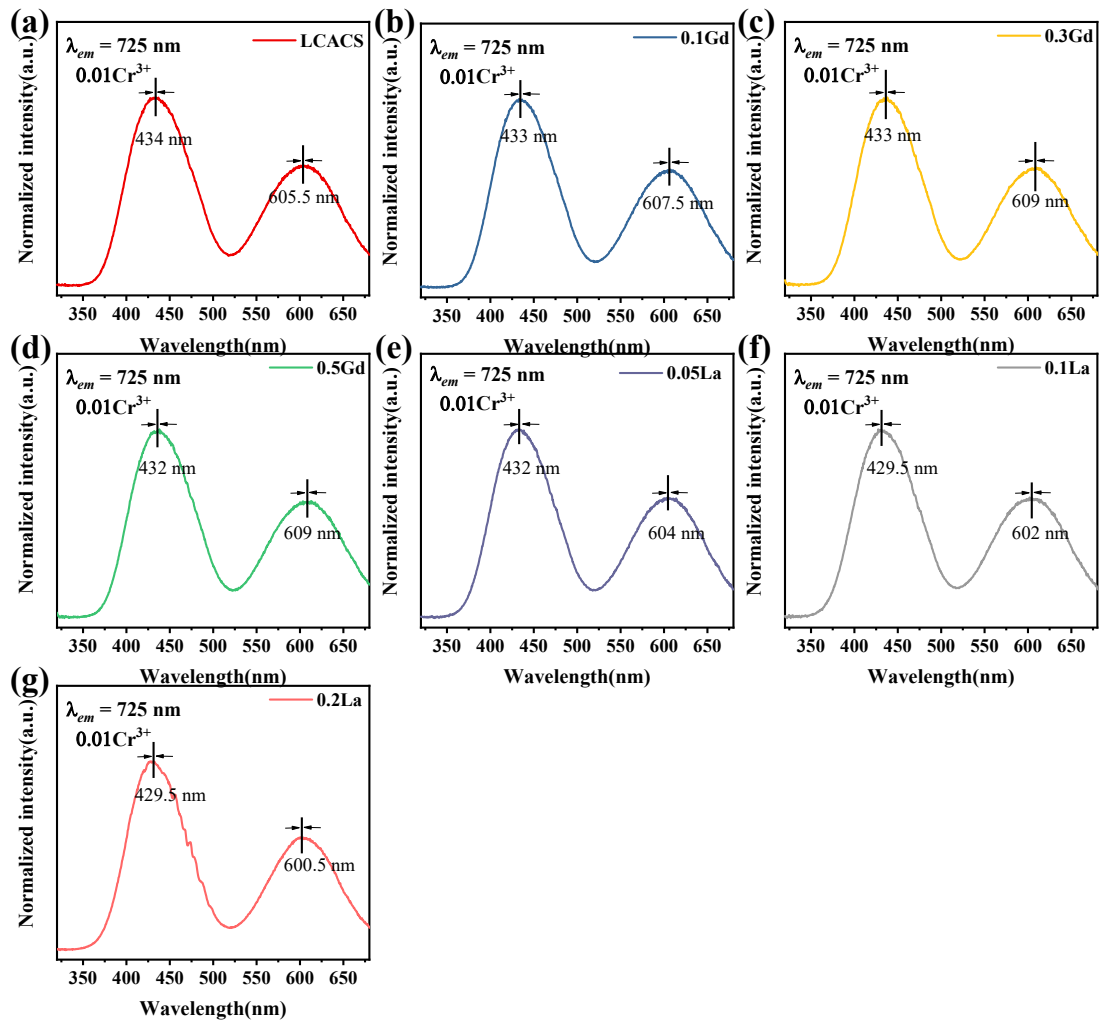

**Fig. S2** Detail spectral shift value of PLE spectra in A-lattice substitution LCACS:  $x\text{Gd/La}$  ( $x = 0.05\text{-}0.5$ ) phosphors.

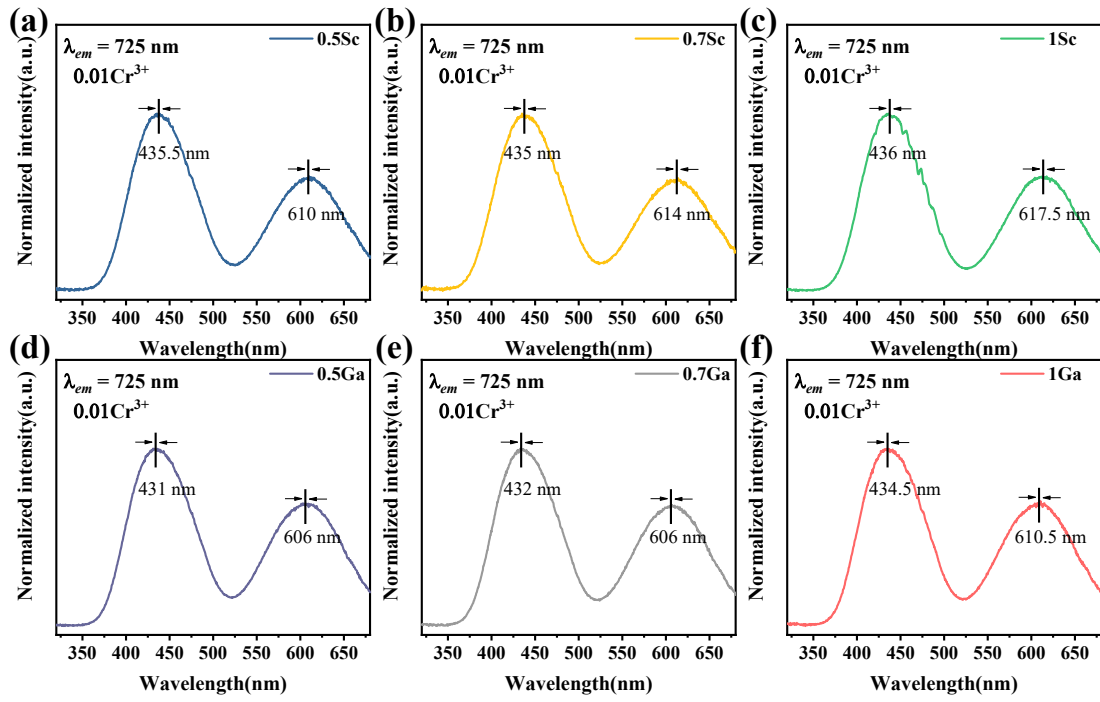

**Fig. S3** Detail spectral shift value of PLE spectra in B-lattice substitution LCACS:  $y\text{Ga}/\text{Sc}$  ( $y = 0.5-1$ ) phosphors.

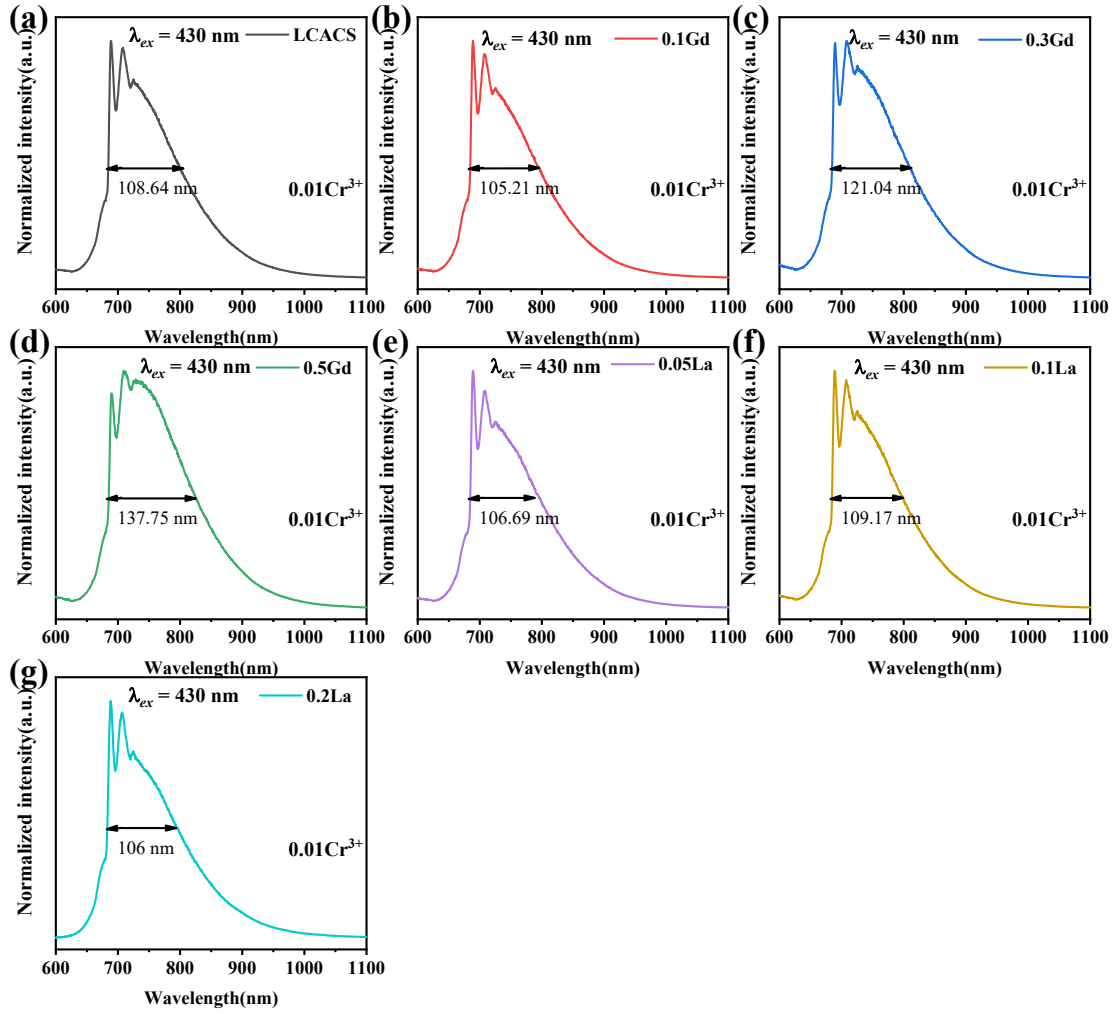

**Fig. S4** The FWHM value of broadband in A-lattice substitution LCACS:  $x\text{Gd/La}$  ( $x = 0.05-0.5$ ) phosphors.

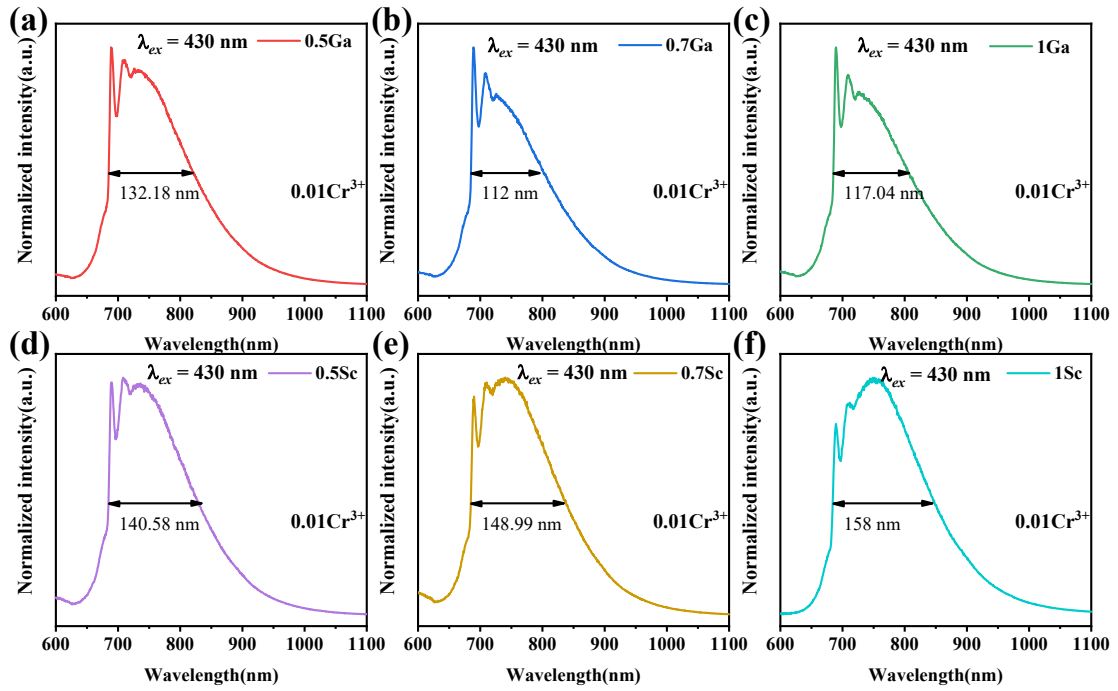

**Fig. S5** The FWHM value of broadband in B-lattice substitution LCACS:  $y$ Ga/Sc ( $y = 0.5-1$ ) phosphors.

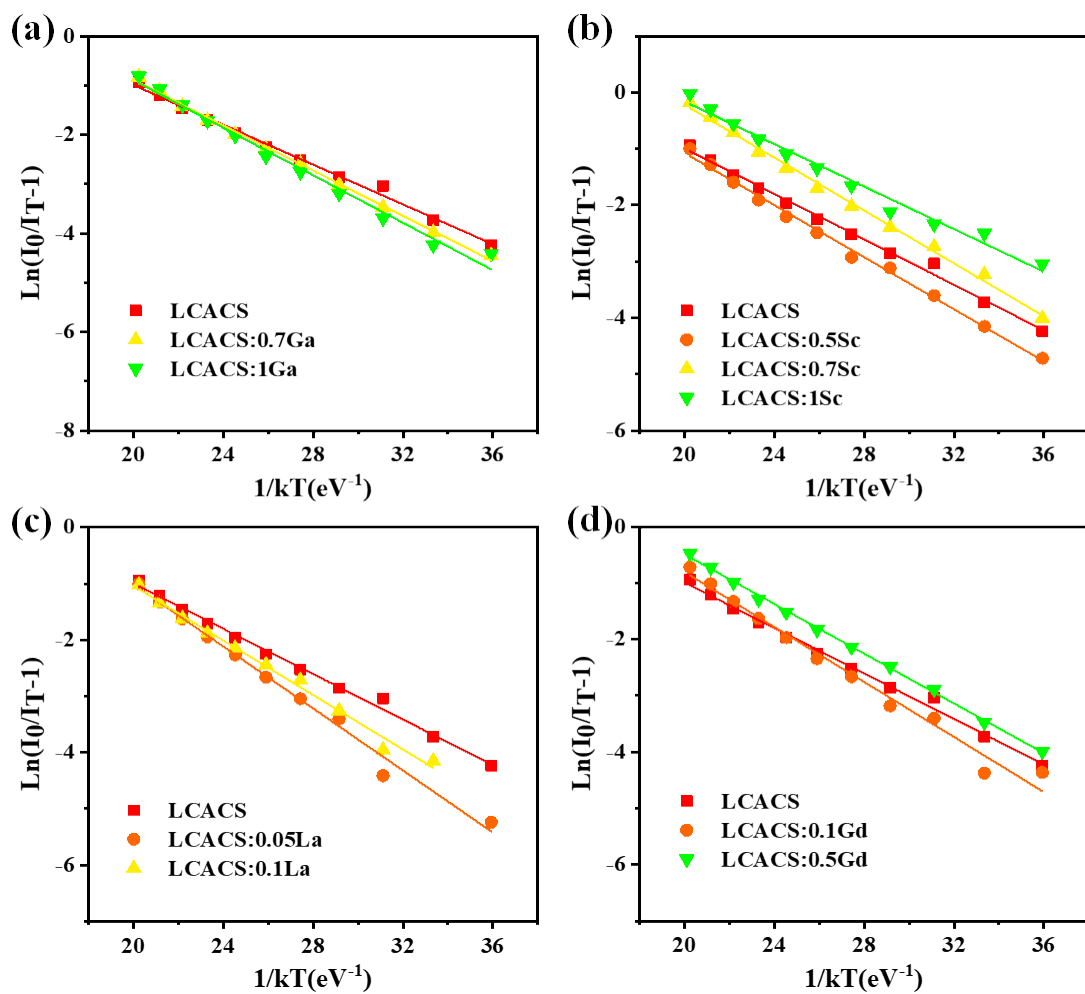

**Fig. S6** Activation energy plots using the modified Arrhenius equation for LCACS:  $x\text{Gd/La}$  ( $x = 0.05-0.5$ ) and LCACS:  $y\text{Ga/Sc}$  ( $y = 0.5-1$ ) phosphors.

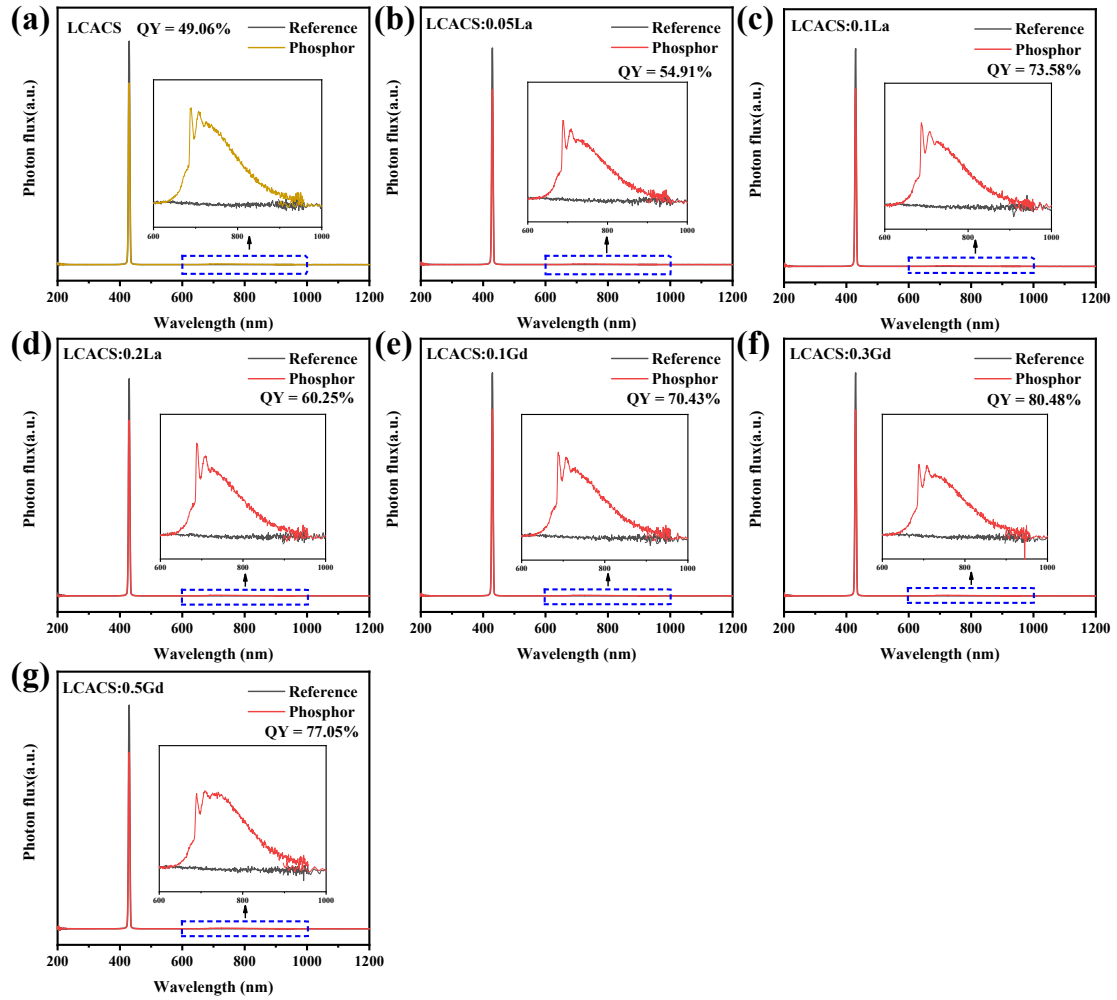

**Fig. S7** The IQE Spectra graph of the test in A-lattice substitution LCACS:  $x$ Gd/La ( $x = 0.05-0.5$ ) phosphors.



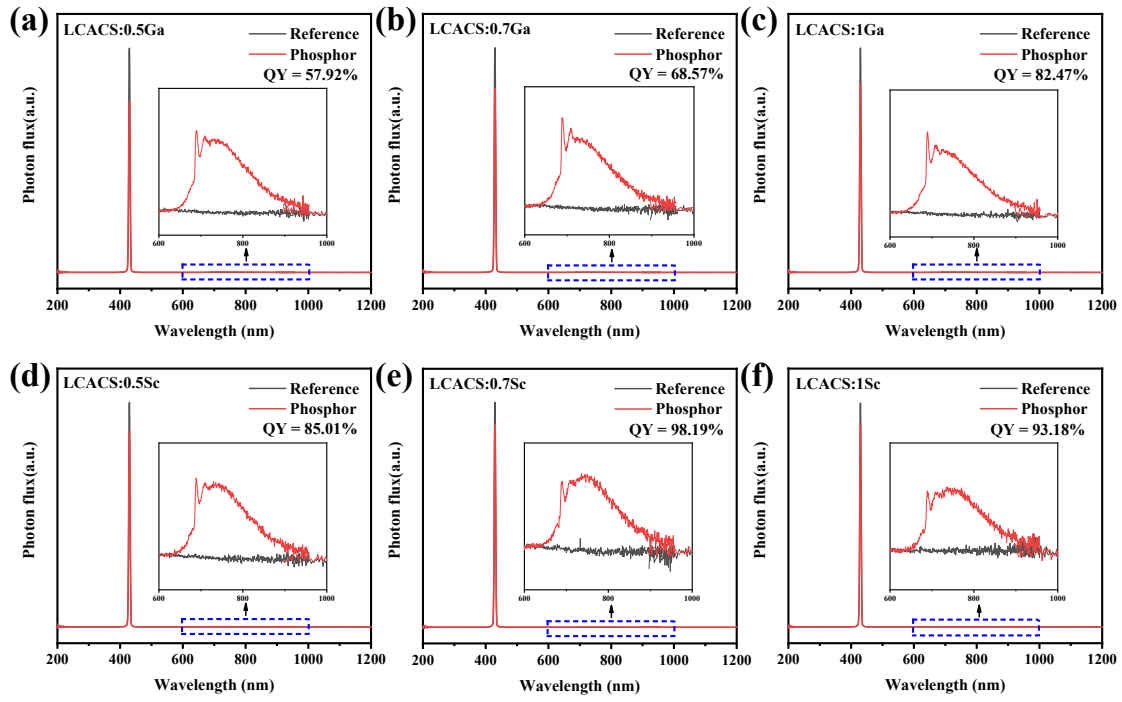

**Fig. S8** The IQE Spectra graph of the test in B-lattice substitution LCACS:  $y$ Ga/Sc ( $y = 0.5-1$ ) phosphors.

**Table S1** Specific activation energy parameters for LCACS:  $x\text{Gd/La}$  ( $x = 0.05\text{-}0.5$ ) and LCACS:  $y\text{Ga/Sc}$  ( $y = 0.5\text{-}1$ ) phosphors.

| <b>Phosphor</b>      | <b><math>\Delta E</math> (eV)</b> | <b><math>R^2</math></b> | <b>Phosphor</b>     | <b><math>\Delta E</math> (eV)</b> | <b><math>R^2</math></b> |
|----------------------|-----------------------------------|-------------------------|---------------------|-----------------------------------|-------------------------|
| <b>LCACS</b>         | 0.202                             | 0.993                   |                     |                                   |                         |
| <b>LCACS: 0.05La</b> | 0.276                             | 0.989                   | <b>LCACS: 0.5Ga</b> | —                                 | —                       |
| <b>LCACS: 0.1La</b>  | 0.243                             | 0.990                   | <b>LCACS: 0.7Ga</b> | 0.230                             | 0.997                   |
| <b>LCACS: 0.2La</b>  | —                                 | —                       | <b>LCACS: 1Ga</b>   | 0.241                             | 0.986                   |
| <b>LCACS: 0.1Gd</b>  | 0.244                             | 0.981                   | <b>LCACS: 0.5Sc</b> | 0.231                             | 0.995                   |
| <b>LCACS: 0.3Gd</b>  | —                                 | —                       | <b>LCACS: 0.7Sc</b> | 0.235                             | 0.995                   |
| <b>LCACS: 0.5Gd</b>  | 0.221                             | 0.998                   | <b>LCACS: 1Sc</b>   | 0.189                             | 0.980                   |
